# Supplementary material for: Measuring cell mechanics by optical alignment compression cytometry
Source: Royal Society of Chemistry journal article supplement (doi:10.1039/c3lc41253a), 2013-01-01
Supplement: c3lc41253a.pdf [file c3lc41253a.pdf]

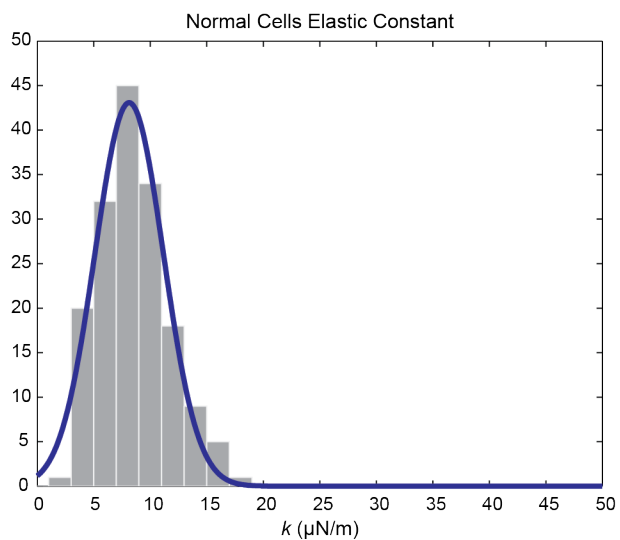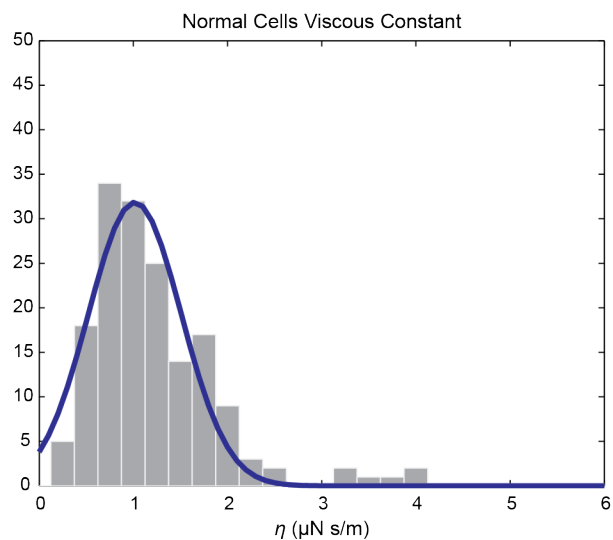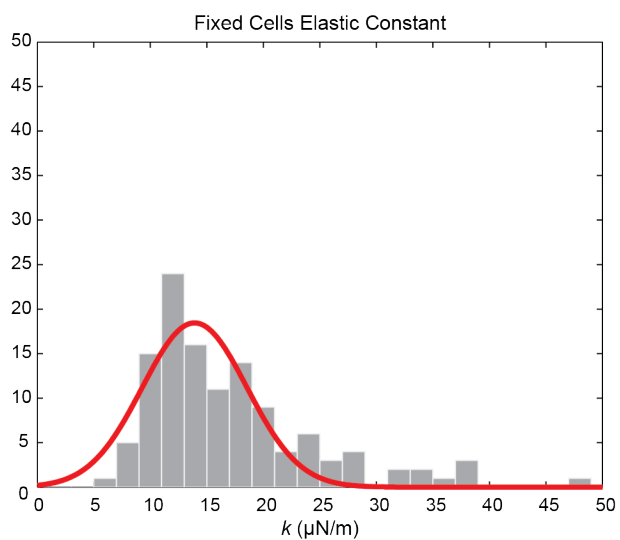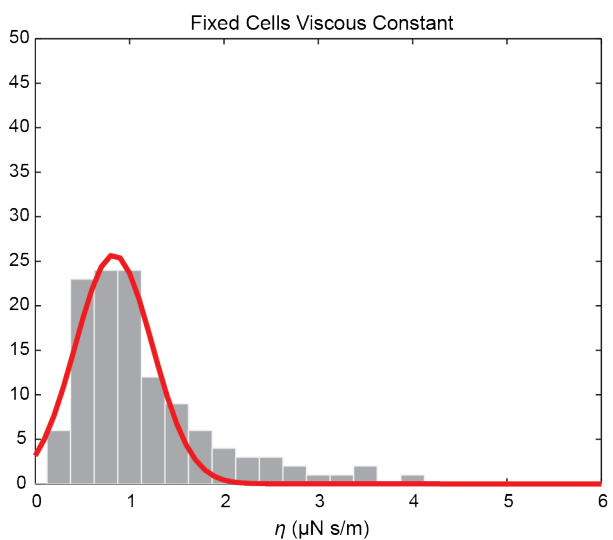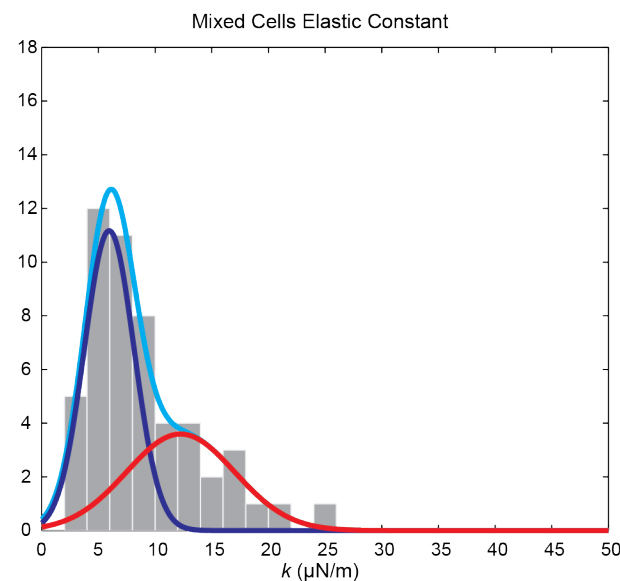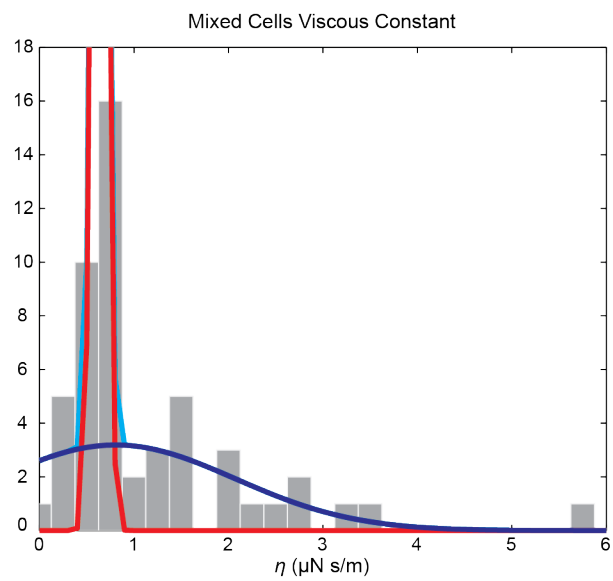

Supplementary Figure 1. Histograms of normal (blue, 165) and fixed (red, 121) cell population data for elastic and viscous constants, shown with the fitted Gaussian distributions. Histograms for mixed cell (cyan, 52) population data are also included. The two Gaussian fit of the mixed data yields  $41\% \pm 9.7\%$  fixed cells.
